# Supplementary material for: Sufficient water intake maintains the gut microbiota and immune homeostasis and promotes pathogen elimination
Source: PubMed Central journal article supplement (PMC11126815; doi:10.1016/j.isci.2024.109903), 2024-05-03
Supplement: mmc1.pdf [file mmc1.pdf]

**iScience, Volume 27**

**Supplemental information**

**Sufficient water intake maintains  
the gut microbiota and immune homeostasis  
and promotes pathogen elimination**

**Kensuke Sato, Mariko Hara-Chikuma, Masato Yasui, Joe Inoue, and Yun-Gi Kim**

## Supplemental Information

**This PDF file includes:**

Figures S1 and S4

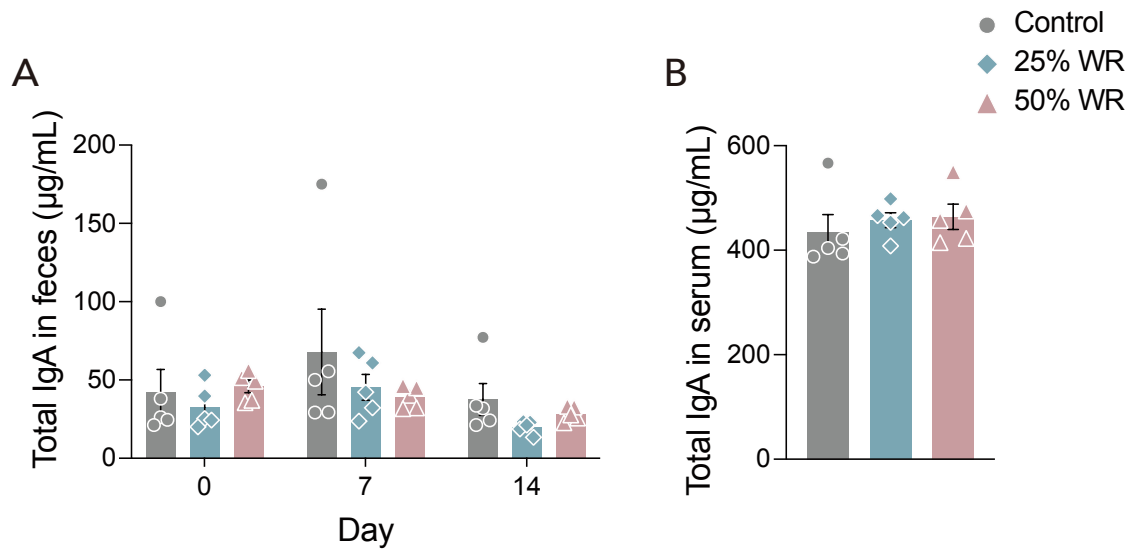

**Figure S1. Total IgA levels are not affected by water restriction, related to Figure 3.**

(A) Total IgA level in feces. (B) Total serum IgA level over 14 days. Plots represent the mean  $\pm$  S.E.M. One-way ANOVA followed by Dunnett's test (B) or two-way ANOVA (A) followed by Dunnett's test.

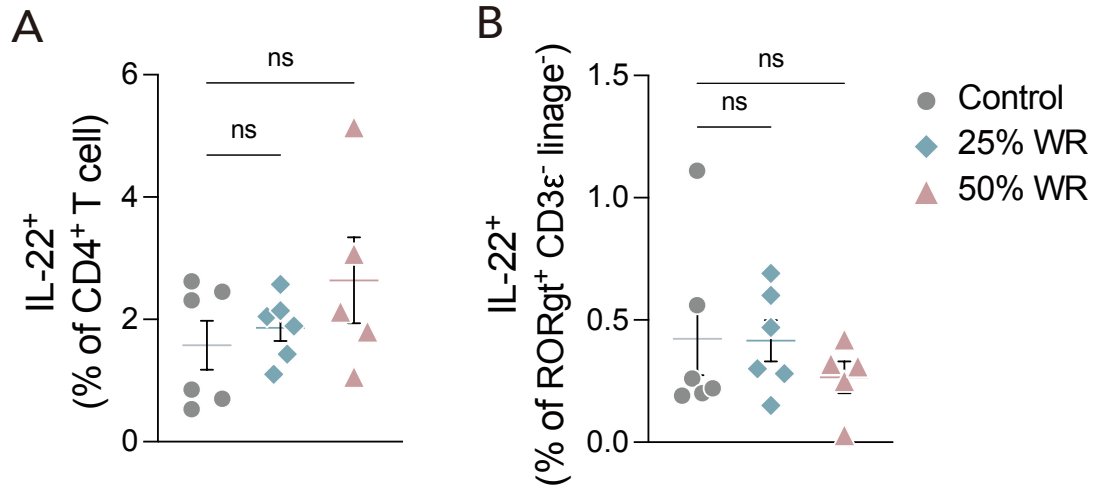

**Figure S2. IL-22<sup>+</sup> CD4<sup>+</sup> T cells and ILC3 were maintained in water-restricted mice, related to Figure 4.**

(A) IL-22<sup>+</sup> subpopulations among CD4<sup>+</sup> T cells in cLPs on days 12 post-infection. (B) IL-22<sup>+</sup> subpopulations among ILC3 (CD45<sup>+</sup> CD3ε<sup>-</sup> lineage<sup>-</sup> RORγt<sup>+</sup>) in cLPs on days 12 post-infection. Plots represent the mean and values ± S.E.M. One-way ANOVA followed by Dunnett's test (A and B).

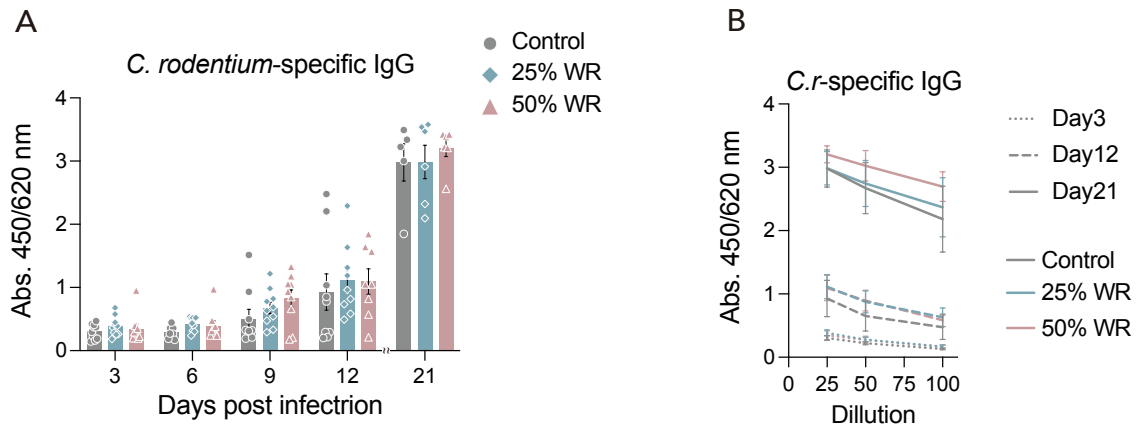

**Figure S3. The *C. rodentium*-specific antibody response is maintained during water restriction, related to Figure 4.**

(A) Temporal *C. rodentium*-specific IgG levels in *C. rodentium*-infected mice. (B) *C. rodentium*-specific IgG antibody titer in serum. Plots represent the mean and values  $\pm$  S.E.M. One-way ANOVA followed by Dunnett's test (A) or two-way ANOVA (B) followed by Dunnett's test.

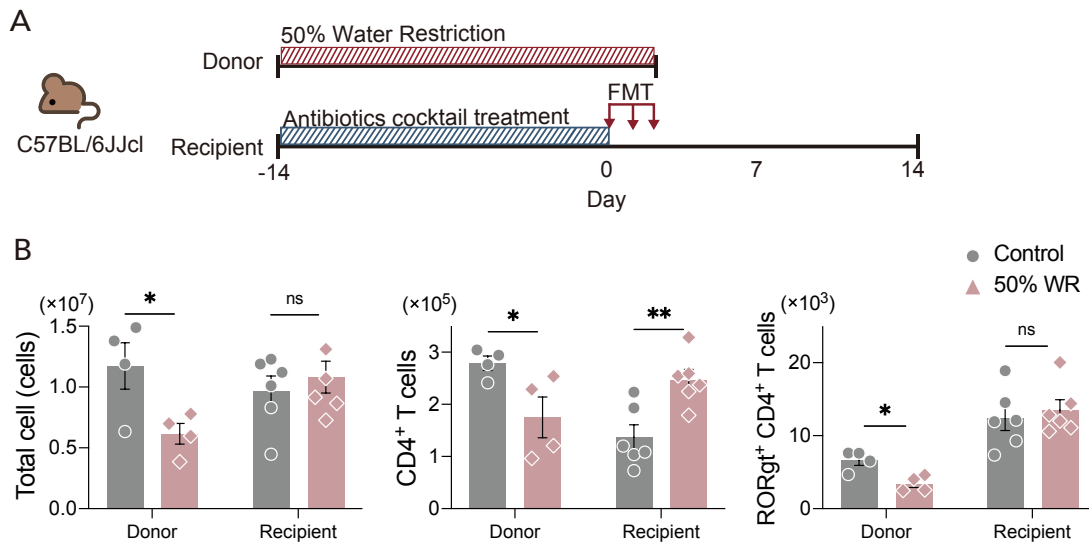

**Figure S4. The microbiome altered by water restriction did not decrease Th17 cells in cLPs, related to Figure 3.**

(A) Diagram illustrating the protocol for fecal microbiota transplantation (FMT). (B) The number of total cells, CD4<sup>+</sup> T cells, ROR $\gamma$ <sup>+</sup> CD4<sup>+</sup> T cells in cLPs. Plots represent the mean and values  $\pm$  S.E.M. Unpaired t-test (B). \*\* $P < 0.01$ , \* $P < 0.05$ .
